# Supplementary material for: Stromal Cell-Derived Factor-1α Alleviates Calcium-Sensing Receptor Activation-Mediated Ischemia/Reperfusion Injury by Inhibiting Caspase-3/Caspase-9-Induced Cell Apoptosis in Rat Free Flaps
Source: Hindawi journal article supplement (doi:10.1155/2018/8945850), 2018-01-01

**Supplemental Figure 1** A 3-h period of flap ischemia was elected among different time points (i.e., hours 1, 2, 3, and 4) because of the highest expression of p-CaSR protein. \*\*\* $P < 0.001$  versus 3-h of ischemia.

Supplemental Figure 1

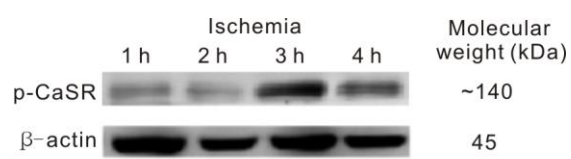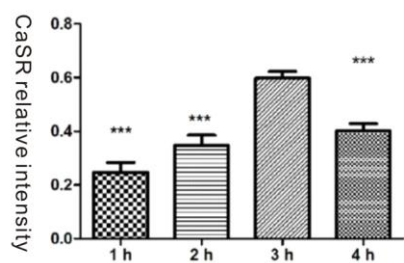

Supplement: f1 [file 8945850.f1.pdf]
